# Supplementary material
Source: publisher figshare collection journal article supplement (https://gsajournals.figshare.com/ndownloader/files/26770217)
Supplement: Supplementary file 1 [file 26770217]

## Sheet: Strains
	Table S2. List of yeast strains used.
Strain ID	Name	Background	Relevant Genotype	References
DSY3	BY4741	BY4741	MATa his3Δ1 leu2Δ0 met15Δ0 ura3Δ0	Salim et al. (2017)
DSY18	W303	W303-a	MATa {leu2-3,112 trp1-1 can1-100 ura3-1 ade2-1 his3-11,15} [phi+]	Salim et al. (2017)
DSY20.1	MFA1-3×GFP	S288C	MATa ura3-52 his3-Δ200 trp1-1 leu2-3,112, MFA1-3×GFP-HIS5(Sp)	RLY8491 from Zhu et al. (2015)
DSY48.7	RDN25-MATα	DSY20.1	RDN25-MATα-LEU2	This study
DSY33.2	RDN25-MATα (reverse)	DSY20.1	RDN25-MATα-LEU2 (reverse orientation)	This study
DSY64.1	RDN18-MATα	DSY20.1	RDN18-MATα-LEU2	This study
DSY65.1	RDN58-MATα	DSY20.1	RDN58-MATα-LEU2	This study
DSY77.2	RDN25-MATα (W303)	DSY18	ade2-1::ADE2, MFA1-3×GFP-URA3, RDN25-MATα-LEU2	This study
DSY99.12	TUB1-MATα	DSY20.1	TUB1-MATα-LEU2	This study
DSY75.13	RDN25-MATα top1Δ	DSY48.7	top1Δ::NatMX	This study
DSY184.1	RDN25-MATα rad52Δ	DSY48.7	rad52Δ::KanMX	This study
DSY185.9	RDN25-MATα tof1Δ	DSY48.7	tof1Δ::KanMX	This study
DSY186.17	RDN25-MATα csm3Δ	DSY48.7	csm3Δ::KanMX	This study
DSY80.1, DSY80.9	RDN25-MATα fob1Δ	DSY48.7	fob1Δ::NatMX	This study
DSY79.8	RDN25-MATα (W303) fob1Δ	DSY77.2	fob1Δ::NatMX	This study
DSY73	RDN18-MATα fob1Δ	DSY64.1	fob1Δ::NatMX	This study
DSY74	RDN58-MATα fob1Δ	DSY65.1	fob1Δ::NatMX	This study
DSY131	CUP1-MATα (2×CUP1)	DSY20.1	CUP1-MATα-LEU2, 2×CUP1	This study
DSY132, DSY133	CUP1-MATα (12×CUP1)	DSY20.1	CUP1-MATα-LEU2, 12×CUP1	This study
DSY134	CUP1-MATα (17×CUP1)	DSY20.1	CUP1-MATα-LEU2, 17×CUP1	This study
DSY135	CUP1-MATα (6×CUP1)	DSY20.1	CUP1-MATα-LEU2, 6×CUP1	This study
DSY149.1	CUP1-MATα (2×CUP1) cup2Δ	DSY131	cup2Δ::KanMX	This study
DSY150.7	CUP1-MATα (12×CUP1) cup2Δ	DSY132	cup2Δ::KanMX	This study
DSY151.7	CUP1-MATα (12×CUP1) cup2Δ	DSY133	cup2Δ::KanMX
DSY152.8	CUP1-MATα (17×CUP1) cup2Δ	DSY134	cup2Δ::KanMX	This study
DSY153.4	CUP1-MATα (6×CUP1) cup2Δ	DSY135	cup2Δ::KanMX	This study
DSY155.1	CUP1-MATα (2×CUP1) cup2Δ (+PGAL1-CUP1)	DSY149.1	PGAL1-YHR055C-URA3	This study
DSY158.1	CUP1-MATα (17×CUP1) cup2Δ (+PGAL1-CUP1)	DSY152.8	PGAL1-YHR055C-URA3	This study
DSY82.1	RDN25-MATα rnh1Δrnh201Δ	DSY48.7	rnh1Δ::NatMX rnh201Δ::KanMX	This study
DSY81	RDN25-MATα hmo1Δ	DSY48.7	hmo1Δ::KanMX	This study
DSY101.1	RDN25-MATα rpa34Δ	DSY48.7	rpa34Δ::KanMX	This study
DSY102.3	RDN25-MATα rpa49Δ	DSY48.7	rpa49Δ::KanMX	This study
DSY143.1	TUB1-MATα rtt109Δ	DSY99.12	rtt109Δ::KanMX	This study
DSY214.8	TUB1-MATα hst3Δhst4Δ	DSY99.12	hst3Δ::KanMX hst4Δ::NatMX	This study
DSY90.1	RDN25-MATα rtt109Δ	DSY48.7	rtt109Δ::KanMX	This study
DSY93.1	RDN25-MATα hst3Δhst4Δ	DSY48.7	hst3Δ::KanMX, hst4Δ::NatMX	This study
DSY87	YBL574		MATa, leu2Δ1, his3Δ200, ura3-52, trp1Δ63, lys2-128δ, (hht1-hhf1)ΔLEU2 (hht2-hhf2)Δ::HIS3 Ty912Δ35-lacZ::his4, {pDM9-HHT1-HHF1-URA3}	Nakanishi et al., 2008
DSY137	RDN25-MATα (YBL574)	YBL574	DSY87, except his4::HIS4, (hht1-hhf1)ΔNATMX (hht2-hhf2)Δ::KANMX, MFA1-3×GFP-HIS5(Sp), RDN25-MATα-LEU2	This study
DSY138.1	RDN25-MATα (YBL574) HHT2-HHF2	DSY137	plasmid shuffle with {p-HHT2-HHF2-TRP1}	This study. Plasmids from SHIMA library (Nakanishi et al., 2008).
DSY139.1	RDN25-MATα (YBL574) H3K56A	DSY137	plasmid shuffle with {p-hht2(K56A)-HHF2-TRP1}
DSY140.1	RDN25-MATα (YBL574) H3K56R	DSY137	plasmid shuffle with {p-hht2(K56R)-HHF2-TRP1}
DSY141.1	RDN25-MATα (YBL574) H3K56Q	DSY137	plasmid shuffle with {p-hht2(K56Q)-HHF2-TRP1}
DSY142.1	RDN25-MATα (YBL574) H3K9A	DSY137	plasmid shuffle with {p-hht2(K9A)-HHF2-TRP1}
DSY210.1	RDN25-MATα (YBL574) H3K14A	DSY137	plasmid shuffle with {p-hht2(K14A)-HHF2-TRP1}
DSY163.1	6×CUP1-MATα rtt109Δ	DSY135	rtt109Δ::KanMX	This study
DSY192.9	6×CUP1-MATα hst3Δhst4Δ	DSY135	hst3Δ::KanMX hst4Δ::NatMX	This study
DSY154.1	17×CUP1-MATα rtt109Δ	DSY134	rtt109Δ::KanMX	This study
DSY208.1	17×CUP1-MATα hst3Δhst4Δ	DSY134	hst3Δ::KanMX hst4Δ::NatMX	This study
DSY160.1	RDN25-MATα +p5472	DSY48.7	p5472 (MoBY Empty vector)	This study. Plasmids from MoBY-ORF collection Ho et al., 2009.
DSY231.1, DSY231.2	RDN25-MATα +p5472-SMC1	DSY48.7	p5472-SMC1
DSY232.1, DSY232.2	RDN25-MATα +p5472-SMC3	DSY48.7	p5472-SMC3
DSY233.2, DSY233.4	RDN25-MATα +p5472-ECO1	DSY48.7	p5472-ECO1
DSY234.1	RDN25-MATα +p5472-SCC2	DSY48.7	p5472-SCC2
DSY235.1	RDN25-MATα +p5472-MCD1	DSY48.7	p5472-MCD1
DSY236.1	RDN25-MATα +p5472-RAD61	DSY48.7	p5472-RAD61
DSY222.1, DSY222.2, DSY222.3, DSY222.5	RDN25-MATα +pRS314	DSY48.7	pRS314 Empty vector	This study
DSY230.1, DSY230.2, DSY230.3	RDN25-MATα +pRS314-ESP1	DSY48.7	pRS314-ESP1	This study. pRS314-ESP1 from Zhu et al., 2015.
